# Supplementary material for: Soil hydraulic and hydrological data from seven field sites in the Thames catchment, UK, 2021
Source: Copernicus journal article supplement (doi:10.5194/essd-17-4277-2025), 2025-09-03
Supplement: Supplementary file 1 [file essd-17-4277-2025-supplement.zip]

## Sheet: Sheet1
Soil porosity is estimated using total porosity = 1-(BD/particle density)
g/cm3		g/cm3	g/cm3	uniform particle density	possible particle density
BD		uniform particle density	possible particle density	estimated porosity cm3/cm3	estimated porosity cm3/cm3	porosity error cm3/cm3	porosity error %
Min BD	0.72	2.65	2.42	0.728302	0.702479	0.0258225	3.54558
Max BD	1.75	2.65	3.1	0.339623	0.435484	-0.0958612	-28.2258
Mean BD	1.25	2.65	2.42	0.528302	0.483471	0.0448308	8.48583
Min BD	0.72	2.65	3.1	0.728302	0.767742	-0.03944	-5.41534
Max BD	1.75	2.65	2.42	0.339623	0.27686	0.0627631	18.4803
Mean BD	1.25	2.65	3.1	0.528302	0.596774	-0.0684723	-12.9608
						MAX	18.5
						MIN	-28.2
