# Supplementary material for: Soil hydraulic and hydrological data from seven field sites in the Thames catchment, UK, 2021
Source: Copernicus journal article supplement (doi:10.5194/essd-17-4277-2025), 2025-09-03
Supplement: Supplementary file 1 [file essd-17-4277-2025-supplement.zip]

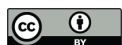

*Supplement of*

## **Soil hydraulic and hydrological data from seven field sites in the Thames catchment, UK, 2021**

**John Robotham et al.**

*Correspondence to:* James Blake ([jarib@ceh.ac.uk](mailto:jarib@ceh.ac.uk))

- [essd-17-4277-2025-supplement-title-page.pdf](#)
- [Table S1 \(porosity uncertainty estimates\) FINAL.xlsx](#)

The copyright of individual parts of the supplement might differ from the article licence.
